# Supplementary material for: Dynamic Responses of Streptomyces albulus QLU58 and Its Acid-Tolerant Derivatives to the Autoacidification in ε-Poly-l-Lysine Production
Source: MDPI journal article supplement (doi:10.3390/fermentation9050459), 2023-05-10
Supplement: s1 [file s1]

**Table S1.** Sequences of primer used in qRT-PCR assay

| Gene        | Gene product                | Primer sequence (5'-3')                                   |
|-------------|-----------------------------|-----------------------------------------------------------|
| <i>atpB</i> | F0F1 ATP synthase subunit B | F: TACAAGGACCTCCAGGACATCATCG<br>R: GTGGGTGTTCTGCGACAGGAAG |
| <i>gadA</i> | Glutamate decarboxylase     | F: CAACGCCTACCAGTTCGTCCAC<br>R: TCATGTTCTTGTCGCGGCACTC    |
| <i>arcA</i> | Arginine deiminase          | F: ACCTCGACGACTTCCTGTTGGG<br>R: TGGTGGTAGATGGCCTCGTAGTG   |
| <i>pls</i>  | $\epsilon$ -PL synthase     | F: CGCGACCTGTGTATCGAGAT<br>R: CGAGGATGGACAGGTACAGC        |
| 16s rDNA    | Reference gene              | F: CGCAAGGCTAAAACTCAAAGGA<br>R: AACCCAACATCTCACGACACGA    |

**Table S2.** Changes of intracellular fatty acid composition in the batch fermentation for  $\epsilon$ -PL production by *S. albulus*

| Fatty acid        | Relative fatty acid content (%) |            |            |            |            |            |            |            |            |            |            |            |
|-------------------|---------------------------------|------------|------------|------------|------------|------------|------------|------------|------------|------------|------------|------------|
|                   | 12 h                            |            |            | 18 h       |            |            | 24 h       |            |            | 48 h       |            |            |
|                   | QLU58                           | AAE43      | AAE89      | QLU58      | AAE43      | AAE89      | QLU58      | AAE43      | AAE89      | QLU58      | AAE43      | AAE89      |
| C <sub>12:0</sub> | 7.01±1.04                       | 5.63±0.54  | 5.45±0.33  | 5.71±0.56  | 4.21±0.38  | 4.06±0.23  | 5.01±0.52  | 3.27±0.29  | 3.66±0.34  | 5.68±0.61  | 4.89±0.43  | 5.17±0.43  |
| C <sub>13:0</sub> | 6.82±0.82                       | 4.22±0.37  | 3.64±0.24  | 2.43±0.37  | 4.07±0.20  | 4.94±0.45  | 4.54±0.19  | 5.91±0.44  | 4.01±0.38  | 6.60±0.31  | 7.52±0.27  | 6.70±0.37  |
| C <sub>14:0</sub> | 15.69±1.12                      | 15.87±1.03 | 15.63±1.28 | 11.64±1.27 | 8.85±1.00  | 8.23±0.79  | 12.95±1.52 | 11.68±0.94 | 11.69±1.04 | 15.08±1.55 | 13.22±1.24 | 10.30±1.19 |
| C <sub>14:1</sub> | 2.13±0.32                       | 2.47±0.32  | 2.23±0.44  | 3.12±0.27  | 3.45±0.45  | 2.36±0.31  | 3.63±0.63  | 3.78±0.27  | 3.46±0.26  | 3.87±0.55  | 4.22±0.34  | 2.81±0.22  |
| C <sub>15:0</sub> | 23.56±2.86                      | 24.62±1.36 | 24.13±1.63 | 24.51±2.13 | 23.45±1.22 | 24.14±2.06 | 22.45±1.85 | 22.34±1.17 | 21.29±1.14 | 21.66±2.05 | 21.96±1.25 | 23.81±0.88 |
| C <sub>16:0</sub> | 23.65±1.75                      | 21.84±1.64 | 23.56±1.37 | 25.04±2.03 | 24.19±1.71 | 23.68±1.75 | 25.95±2.48 | 24.59±1.02 | 25.92±1.48 | 23.01±2.29 | 21.32±1.33 | 21.90±1.32 |
| C <sub>16:1</sub> | 1.39±0.33                       | 1.85±0.23  | 1.75±0.25  | 1.68±0.22  | 2.56±0.17  | 2.23±0.13  | 2.00±0.17  | 2.64±0.35  | 3.05±0.42  | 2.26±0.32  | 3.09±0.28  | 3.65±0.57  |
| C <sub>17:0</sub> | 10.67±1.76                      | 12.71±1.01 | 12.56±1.01 | 13.46±1.23 | 14.50±1.26 | 14.01±0.76 | 10.90±2.03 | 13.43±1.12 | 11.70±1.24 | 9.06±1.17  | 10.64±1.33 | 12.28±0.83 |
| C <sub>18:0</sub> | 5.87±0.38                       | 7.32±0.36  | 6.92±0.39  | 8.21±0.46  | 10.50±0.24 | 11.04±0.57 | 7.72±0.52  | 7.05±0.27  | 9.71±0.48  | 7.22±0.45  | 7.67±0.31  | 6.67±0.34  |

|                   |           |           |           |           |           |           |           |           |           |           |           |           |
|-------------------|-----------|-----------|-----------|-----------|-----------|-----------|-----------|-----------|-----------|-----------|-----------|-----------|
| C <sub>18:1</sub> | 3.20±0.21 | 3.45±0.25 | 4.12±0.28 | 4.20±0.17 | 4.21±0.41 | 5.30±0.33 | 4.86±0.35 | 5.31±0.35 | 5.51±0.33 | 5.56±0.22 | 5.47±0.37 | 6.71±0.45 |
|-------------------|-----------|-----------|-----------|-----------|-----------|-----------|-----------|-----------|-----------|-----------|-----------|-----------|
